# Supplementary material for: Cold tolerance strategies of freshwater mussels across latitudes
Source: Research Square preprint supplement (doi:10.21203/rs.3.rs-5596428/v1), 2025-05-16
Supplement: Supplementary file 1 [file 20fb8bc04289da112e9da085.docx]

**Supplementary Materials for**

**Cold tolerance strategies of freshwater mussels across latitudes**

Anna M. Lipińska*1, Paweł Adamski1, Adam M. Ćmiel1, Maria J. Golab1, Paulina A. Idczak-Figiel2, Manuel Lopes-Lima3, 4, Jon H. Mageroy 5, Anna Nowakowska6, Martin Österling7, Szymon Sniegula1, Amílcar Teixeira 8, Silvana Costa9, Simone Varandas10, Dariusz Halabowski*11, 12

*1Institute of Nature Conservation, Polish Academy of Sciences, Krakow, Poland;*

*2* *Academia Copernicana, Department of Animal Physiology and Neurobiology, Faculty of Biological and Veterinary Sciences, Nicolaus Copernicus University in Torun, Torun, Poland;*

*3 CIBIO, Centro de Investigação em Biodiversidade e Recursos Genéticos, InBIO Laboratório; Associado, Universidade do Porto, Vairão, Portugal*

*4 BIOPOLIS Program in Genomics, Biodiversity and Land Planning, CIBIO, Vairão, Portugal*

*5 Norwegian Institute for Nature Research, Sognsveien 68, 0855 Oslo, Norway;*

*6 Department of Animal Physiology and Neurobiology, Faculty of Biological and Veterinary Sciences, Nicolaus Copernicus University, Toruń, Poland*

*7River Ecology and Management, Research Group RivEM, Department of Environmental and Life Sciences, Karlstad University, 65188, Karlstad, Sweden;*

*8 CIMO, LA SusTEC, Instituto Politécnico de Bragança, Campus de Santa Apolónia, 5300-253 Bragança, Portugal*

*9 MORE- Laboratório Colaborativo Montanhas de Investigação- Associação, Portugal.*

*10 CITAB- Center for Research and Technology of Agro-Environment and Biological Sciences, University of Trás-os-Montes and Alto Douro, Vila Real, Portugal;*

*11 University of Lodz, Faculty of Biology and Environmental Protection, Department of Ecology and Vertebrate Zoology, Lodz, Poland;*

*12 Czech Academy of Sciences, Institute of Vertebrate Biology, Brno, Czech Republic*

* Correspondence: lipinska@iop.krakow.pl, dariusz.halabowski@biol.uni.lodz.pl**Table S1.** The results of the General Linear Model showing the effect of region, habitat type and mussel’s age on the mussel shell length. η2 – effect size of a given predictor.

| Effect | df | η2 | MS | F | p |
| --- | --- | --- | --- | --- | --- |
| Intercept | 1 |  | 111735.7 | 522.5 | <0.0001 |
| Region | 2 | 0.07 | 2503.0 | 11.71 | <0.0001 |
| Habitat | 1 | 0.04 | 2323.1 | 10.9 | 0.0011 |
| Region*Habitat | 2 | 0.40 | 20562.2 | 96.2 | <0.0001 |
| Age | 1 | 0.40 | 42428.0 | 198.4 | <0.0001 |

**Table S2.** Basic statistics of SCP measured in collected mussels. N – total number of analysed individuals, Npeak – number of individuals that showed SCP peak, LQ – lower quartile, UQ – upper quartile, SD – standard deviation of mean.

| Region/  Country | Habitat  type | N | Npeak (%) | Mean | Median | Min | Max | LQ | UQ | SD |
| --- | --- | --- | --- | --- | --- | --- | --- | --- | --- | --- |
| Northern  Europe | Lowland | 70 | 2 (2.9) | -0.13 | -0.13 | -0.15 | -0.10 | -0.15 | -0.10 | 0.04 |
| Highland | 66 | 5 (7.6) | -0.79 | -1.00 | -1.05 | 0.05 | -1.05 | -0.90 | 0.47 |
| Central  Europe | Lowland | 63 | 0 (0) | - | - | - | - | - | - | - |
| Highland | 24 | 1 (4.2) | -1.65 | -1.65 | -1.65 | -1.65 | -1.65 | -1.65 | - |
| Southern  Europe | Lowland | 42 | 0 (0) | - | - | - | - | - | - | - |
| Highland | 36 | 0 (0) | - | - | - | - | - | - | - |

**Table S3.** Basic statistics of glycogen concentration [µg ml-1] in mussel tissues. N - sample size, LQ – lower quartile, UQ – upper quartile, SD – standard deviation of mean.

| Region | Habitat type | N | Mean | Median | Min | Max | LQ | UQ | SD |
| --- | --- | --- | --- | --- | --- | --- | --- | --- | --- |
| Northern  Europe | Lowland | 25 | 241.3 | 279.2 | 85.4 | 340.0 | 168.3 | 298.2 | 76.3 |
| Highland | 25 | 197.1 | 174.1 | 125.6 | 337.2 | 163.8 | 205.9 | 61.3 |
| Central  Europe | Lowland | 16 | 128.7 | 132.2 | 56.7 | 214.6 | 80.6 | 165.5 | 49.4 |
| Highland | 8 | 146.0 | 162.0 | 65.6 | 193.6 | 123.3 | 169.2 | 40.4 |
| Southern  Europe | Lowland | 20 | 8.5 | 8.8 | 6.0 | 9.9 | 7.3 | 9.7 | 1.3 |
| Highland | 20 | 6.2 | 5.4 | 4.1 | 9.0 | 5.0 | 7.8 | 1.6 |
